# Supplementary material for: Expression of ANGPTL2 and its impact on papillary thyroid cancer
Source: PubMed Central journal article supplement (PMC6668118; doi:10.1186/s12935-019-0908-9), 2019-07-30

# Additional file 1: Figure S1

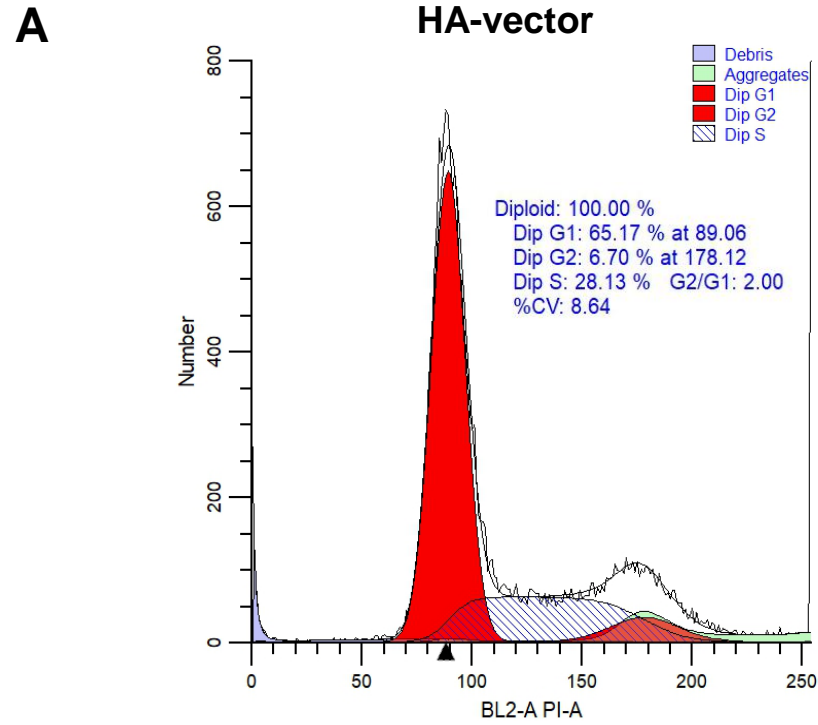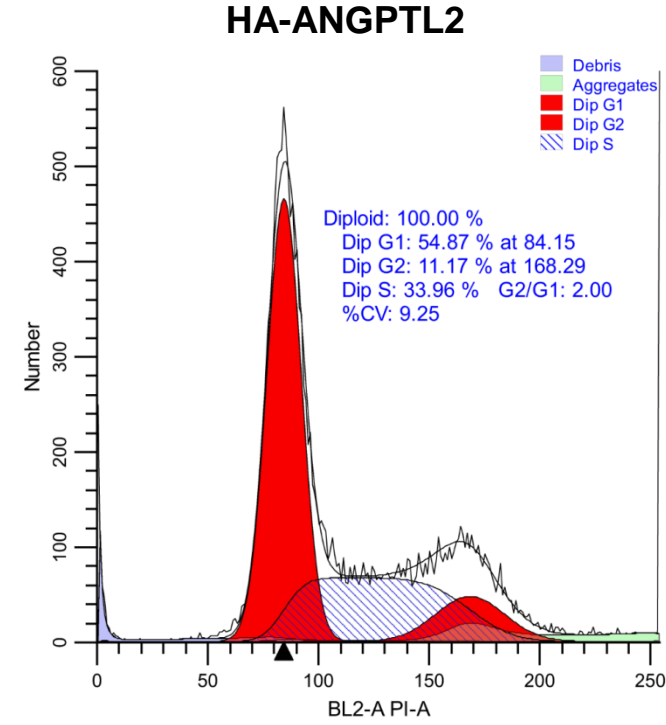

**B**

## Cell Cycle: G1/S Check Point

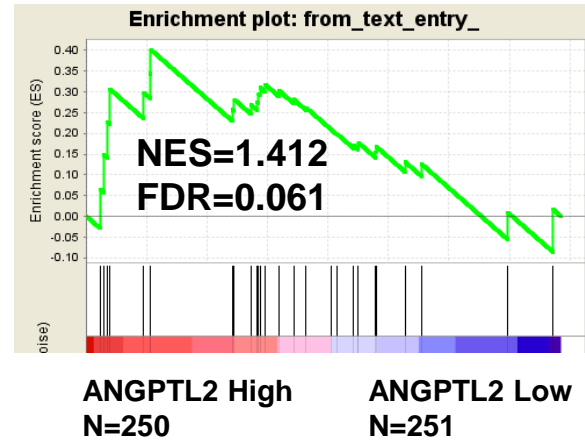

**C**

## Cell Cycle: G2/M Checkpoint

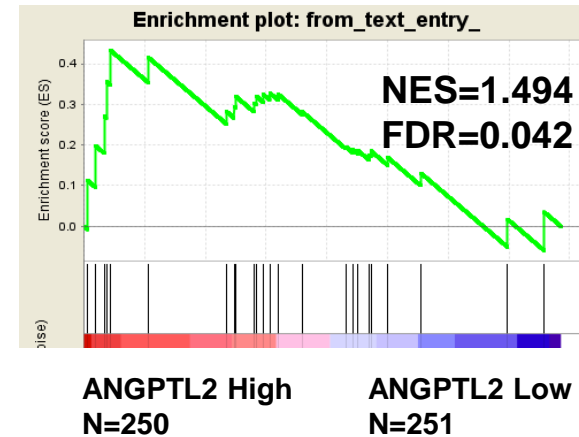

# Additional file 1: Figure S2

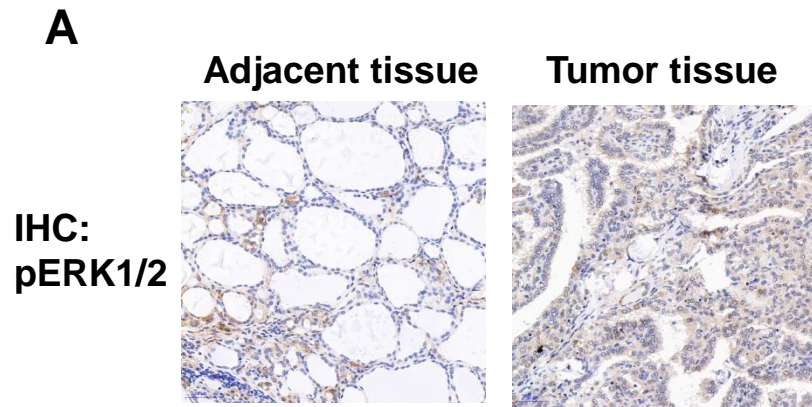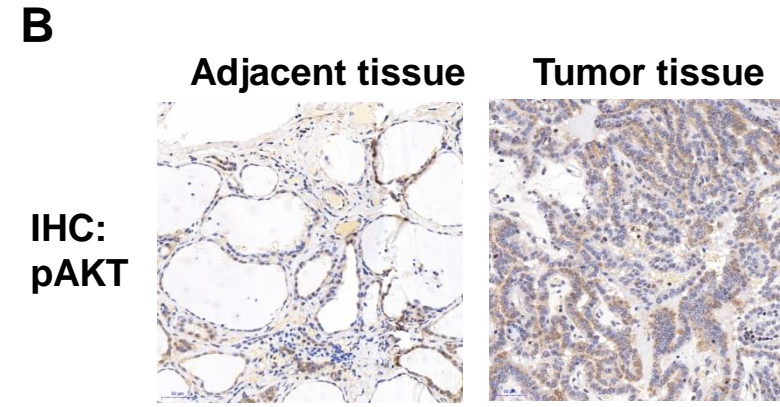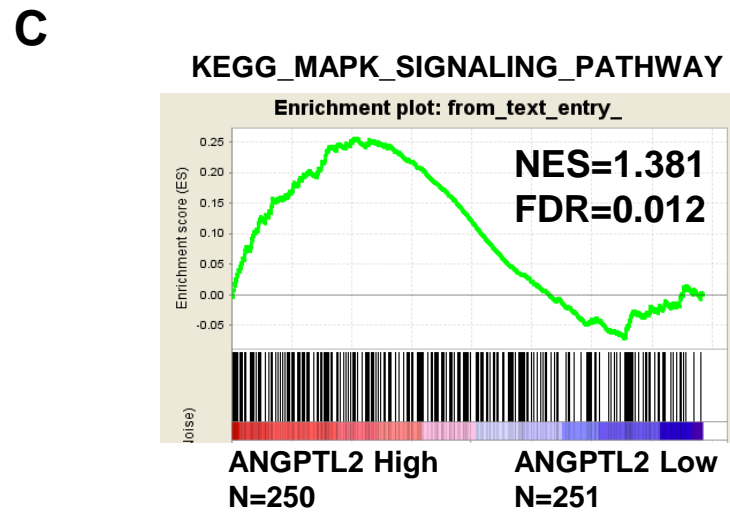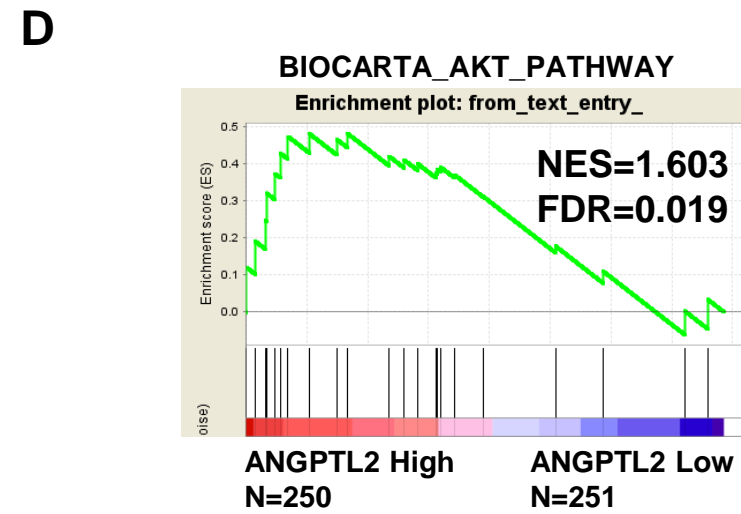

Supplement: 12935_2019_908_MOESM1_ESM.pdf [file 12935_2019_908_MOESM1_ESM.pdf]
